# Supplementary material for: Crystal structure of a tripartite complex between C3dg, C-terminal domains of factor H and OspE of Borrelia burgdorferi
Source: PubMed Central journal article supplement (PMC5708776; doi:10.1371/journal.pone.0188127), 2017-11-30

A.

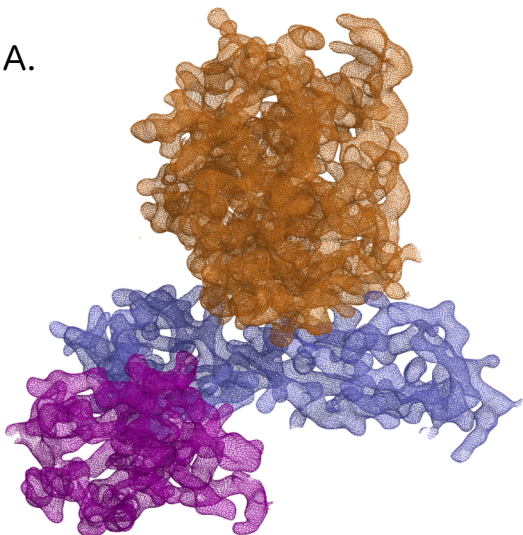

B.

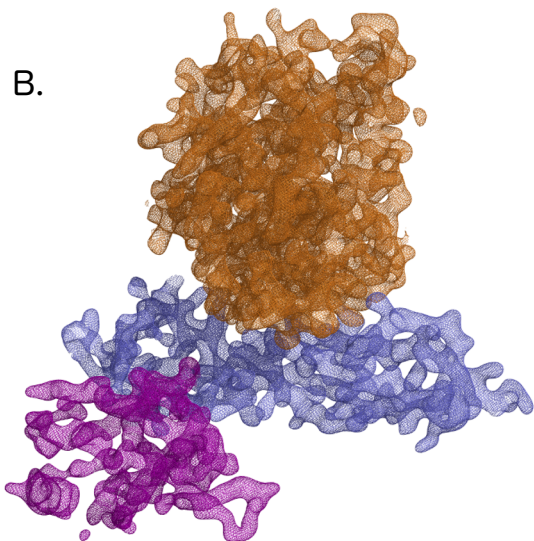

C.

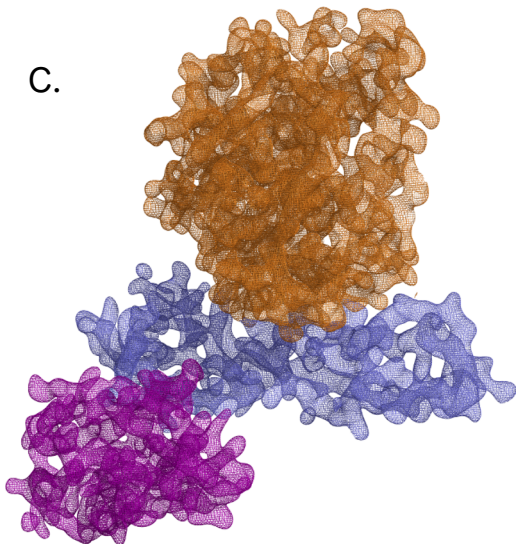

Supplement: pone.0188127.s001.pdf [file pone.0188127.s001.pdf]
