# Supplementary material for: Crystal structure of a tripartite complex between C3dg, C-terminal domains of factor H and OspE of Borrelia burgdorferi
Source: PubMed Central journal article supplement (PMC5708776; doi:10.1371/journal.pone.0188127), 2017-11-30
Supplement: pone.0188127.s004.pdf [file pone.0188127.s004.pdf]

S1 Table. Primers used in the study

| Primer name | Sequence                                                                                               |
|-------------|--------------------------------------------------------------------------------------------------------|
| C3d-F       | CTTTAAGAAGGAGATATACATATGCATCATCATCATCACA<br>GCAGCGGCGAAAACCTGTATTTTCAGAGCGACGCGGAACGGCT<br>GAAGCACCTC  |
| C3dg-F      | CTTTAAGAAGGAGATATACATATGCATCATCATCATCACAG<br>CAGCGGCGAAAACCTGTATTTTCAGAGCGAAGGAGTGCAGAAA<br>GAGGACATCC |
| C3d/g-R     | TCGGGCTTTGTTAGCAGCCGGATCTCAGCGGCTGGGCAGTTGG<br>AGGGACAC                                                |
| QC_A1153E-F | GTTTCATCTCGCTGCAGGAAGCTAAAGATATTTGCGAG                                                                 |
| QC_A1153E-R | CTCGCAAATATCTTTAGCTTCCTGCAGCGAGATGAGAAC                                                                |
| QC_C1010A-F | GACCCCTCGGGCGCGGGGAACAGAAC                                                                             |
| QC_C1010A-R | GTTCTGTTCCCCCGCGCCCGAGGGGGTC                                                                           |
| C3dg-2F     | CTTTAAGAAGGAGATATACATATGGAAGGAGTGCAGAAAGAG<br>GACATCC                                                  |
| C3dg-2R     | GGATGTCCTCTTTCTGCACTCCTTCATATGTATATCTCCTTCTT<br>AAAG                                                   |
| C3d-2F      | CTTTAAGAAGGAGATATACATATGGACGCGGAACGGCTGAAGC<br>ACCTC                                                   |
| C3d-2R      | GAGGTGCTTCAGCCGTTCCGCGTCCATATGTATATCTCCTTCTT<br>AAAG                                                   |
| C3dg-3F     | GTGTCCCTCCAAGTCCCAGCCGCGAAAACCTGTATTTTCAGAG<br>CCATCATCATCATCACTGAGATCCGGCTGCTAACAAAGCCC<br>GA         |
| C3dg-3R     | TCGGGCTTTGTTAGCAGCCGGATCTCAGTGATGATGATGATGAT<br>GGCTCTGAAAATACAGGTTTTTCGCGGCTGGGCAGTTGGAGGGA<br>CAC    |
| C3d-3F      | GTGTCCCTCCAAGTCCCAGCCGCGAAAACCTGTATTTTCAGAG<br>CCATCATCATCATCACTGAGATCCGGCTGCTAACAAAGCCC<br>GA         |
| C3d-3R      | TCGGGCTTTGTTAGCAGCCGGATCTCAGTGATGATGATGATGAT<br>GGCTCTGAAAATACAGGTTTTTCGCGGCTGGGCAGTTGGAGGGA<br>CAC    |
