# Supplementary material for: Crystal structure of a tripartite complex between C3dg, C-terminal domains of factor H and OspE of Borrelia burgdorferi
Source: PubMed Central journal article supplement (PMC5708776; doi:10.1371/journal.pone.0188127), 2017-11-30
Supplement: pone.0188127.s005.pdf [file pone.0188127.s005.pdf]

**S2 Table.** Hydrogen bonds between C3dg and FH19-20 in the CFI-interaction.

| C3dg residue                           | Distance (Å) | FH19-20, residue                       | Analyzed from the crystal structure PDB 2XQW* |
|----------------------------------------|--------------|----------------------------------------|-----------------------------------------------|
| Lys <sup>1106</sup> (N <sup>ζ</sup> )  | n.d.         | Ile <sup>1120</sup> (O)                | 2.83                                          |
| Lys <sup>1106</sup> (N <sup>ζ</sup> )  | n.d.         | Ser <sup>1122</sup> (O)                | 3.73                                          |
| Ile <sup>1108</sup> (O)                | 3.16         | Gln <sup>1139</sup> (N <sup>ε2</sup> ) |                                               |
| Leu <sup>1109</sup> (O)                | 3.36         | Asn <sup>1140</sup> (N)                | 3.01                                          |
| Leu <sup>1109</sup> (O)                | 3.31         | Gln <sup>1137</sup> (N <sup>ε2</sup> ) |                                               |
| Glu <sup>1110</sup> (O <sup>ε1</sup> ) | 2.85         | Gln <sup>1137</sup> (N <sup>ε2</sup> ) | 3.07                                          |
| Glu <sup>1110</sup> (O)                | n.d.         | Asn <sup>1140</sup> (N <sup>δ2</sup> ) | 3.83                                          |
| Gln <sup>1112</sup> (O <sup>ε1</sup> ) | 3.18         | Gln <sup>1139</sup> (N <sup>ε2</sup> ) |                                               |
| Lys <sup>1113</sup> (N <sup>ζ</sup> )  | 2.83         | Asn <sup>1140</sup> (O <sup>δ1</sup> ) |                                               |
| Asp <sup>1115</sup> (O <sup>δ2</sup> ) | 2.97         | Lys <sup>1188</sup> (N <sup>ζ</sup> )  | 2.76                                          |
| Asp <sup>1115</sup> (O <sup>δ1</sup> ) | 2.61         | Tyr <sup>1190</sup> (O <sup>η</sup> )  | 2.61                                          |
| Asn <sup>1163</sup> (N)                | 3.42         | Asp <sup>1119</sup> (O <sup>δ2</sup> ) |                                               |
| Ser <sup>1164</sup> (O <sup>γ</sup> )  | 2.94         | Asp <sup>1119</sup> (O <sup>δ2</sup> ) |                                               |
| Ser <sup>1164</sup> (N)                | 3.38         | Asp <sup>1119</sup> (O <sup>δ2</sup> ) |                                               |
| Lys <sup>1171</sup> (N <sup>ζ</sup> )  | 3.28         | Asn <sup>1117</sup> (O <sup>δ1</sup> ) | 3.49                                          |
| Lys <sup>1171</sup> (N <sup>ζ</sup> )  | 3.16         | Gln <sup>1139</sup> (O <sup>ε1</sup> ) |                                               |
| Lys <sup>1171</sup> (N <sup>ζ</sup> )  | 3.01         | Tyr <sup>1142</sup> (O <sup>η</sup> )  | 2.85                                          |

\* Kajander T, Lehtinen MJ, Hyvärinen S, Bhattacharjee A, Leung E, Isenman DE, et al. Dual interaction of factor H with C3d and glycosaminoglycans in host-nonhost discrimination by complement. PNAS. 2011;108(7):2897-902. doi: 10.1073/pnas.1017087108. PubMed PMID: 21285368; PubMed Central PMCID: PMC3041134.
