# Supplementary material for: Crystal structure of a tripartite complex between C3dg, C-terminal domains of factor H and OspE of Borrelia burgdorferi
Source: PubMed Central journal article supplement (PMC5708776; doi:10.1371/journal.pone.0188127), 2017-11-30
Supplement: pone.0188127.s006.pdf [file pone.0188127.s006.pdf]

**S3 Table.** Hydrogen bonds between FH20 and OspE in the CFI interaction.

| FH residue                             | Distance (Å) | OspE residue                         | Analyzed from the crystal structure PDB 4J38* |
|----------------------------------------|--------------|--------------------------------------|-----------------------------------------------|
| Arg <sup>1182</sup> (N <sup>η2</sup> ) | 3.10         | Asp <sup>73</sup> (O <sup>δ2</sup> ) | 3.02                                          |
| Arg <sup>1182</sup> (N <sup>η2</sup> ) | 2.81         | Glu <sup>68</sup> (O <sup>ε2</sup> ) | 2.97                                          |
| Arg <sup>1182</sup> (N <sup>ε</sup> )  | n.d.         | Thr <sup>84</sup> (O <sup>γ1</sup> ) | 3.75                                          |
| Arg <sup>1182</sup> (O)                | 2.76         | Arg <sup>66</sup> (N <sup>η1</sup> ) | 2.67                                          |
| Trp <sup>1183</sup> (N <sup>ε1</sup> ) | n.d.         | Thr <sup>84</sup> (O <sup>γ1</sup> ) | n.d.                                          |
| Trp <sup>1183</sup> (O)                | 2.81         | Asn <sup>77</sup> (N <sup>δ2</sup> ) | 3.08                                          |
| Thr <sup>1184</sup> (O <sup>δ1</sup> ) | n.d.         | Asn <sup>77</sup> (O <sup>δ1</sup> ) | 3.73                                          |
| Ser <sup>1191</sup> (OG)               | 3.10         | Gly <sup>80</sup> (O)                | 2.61                                          |
| Glu <sup>1195</sup> (O <sup>ε2</sup> ) | 3.77         | Tyr <sup>114</sup> (N <sup>ζ</sup> ) | n.d.                                          |
| Glu <sup>1195</sup> (O <sup>ε2</sup> ) | n.d.         | Gly <sup>80</sup> (N)                | 3.70                                          |
| Ser <sup>1196</sup> (O)                | 3.04         | Ser <sup>82</sup> (N)                | n.d.                                          |
| Ser <sup>1196</sup> (O)                | 3.34         | His <sup>81</sup> (N <sup>δ1</sup> ) | 3.02                                          |
| Ser <sup>1196</sup> (O <sup>γ</sup> )  | 3.83         | Val <sup>120</sup> (O)               | n.d.                                          |
| Glu <sup>1198</sup> (N)                | 2.81         | Ser <sup>82</sup> (O)                | 2.82                                          |
| Glu <sup>1198</sup> (O <sup>ε1</sup> ) | n.d.         | Thr <sup>84</sup> (O <sup>γ1</sup> ) | 2.90                                          |
| Glu <sup>1198</sup> (O <sup>ε1</sup> ) | 3.62         | Thr <sup>84</sup> (N)                | 2.68                                          |
| Arg <sup>1215</sup> (N <sup>η1</sup> ) | 2.88         | Thr <sup>84</sup> (O)                | 3.71                                          |
| Arg <sup>1215</sup> (N <sup>ε</sup> )  | 2.92         | Val <sup>120</sup> (O)               | 2.83                                          |
| Arg <sup>1215</sup> (N <sup>η1</sup> ) | n.d.         | Ile <sup>121</sup> (O)               | 3.46                                          |

- Bhattacharjee A, Oeemig JS, Kolodziejczyk R, Meri T, Kajander T, Lehtinen MJ, et al. Structural basis for complement evasion by Lyme disease pathogen *Borrelia burgdorferi*. *J Biol Chem.* 2013;288(26):18685-95. doi: 10.1074/jbc.M113.459040. PubMed PMID: 23658013; PubMed Central PMCID: PMC3696643.
